# Supplementary material for: The Oncological Implication of Sentinel Lymph Node in Early Cervical Cancer: A Meta-Analysis of Oncological Outcomes and Type of Recurrences
Source: MDPI journal article supplement (doi:10.3390/medicina58111539), 2022-10-27
Supplement: s1 [file s1]

Supplementaries

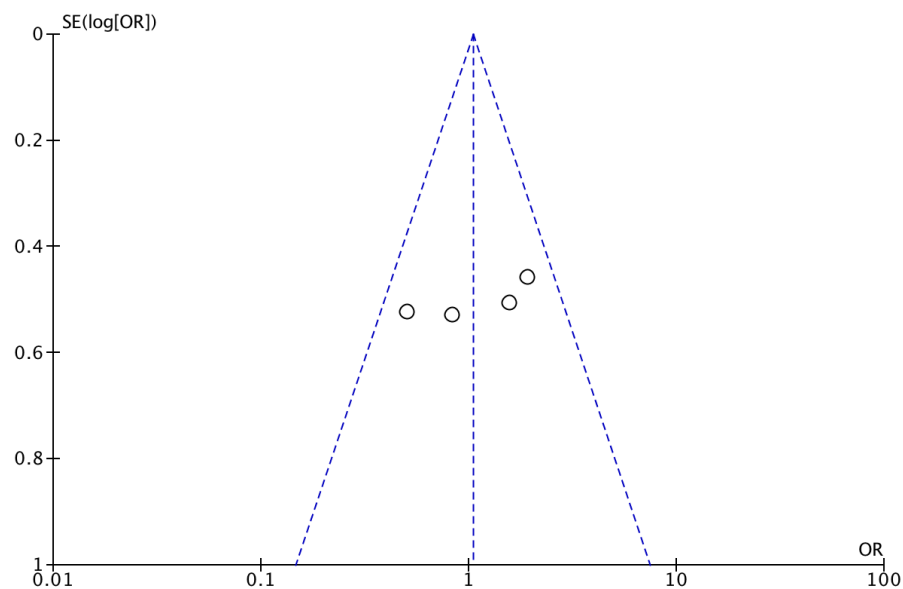

Figure S1. Funnel Plot DFS.

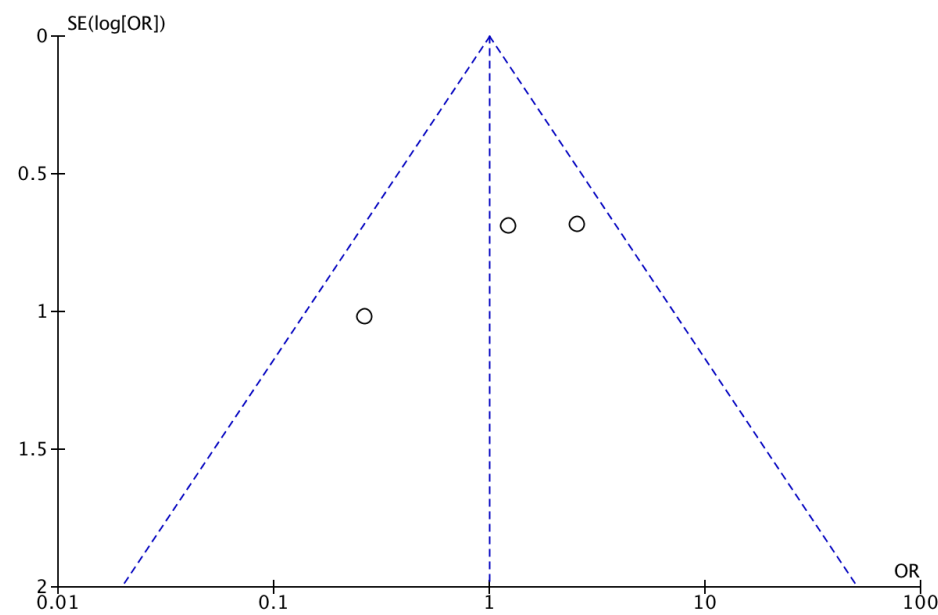

Figure S2. Funnel Plot OS.

Table S1. Newcastle–Ottawa scale.

| Comparative Studies   |         |                                               |           |               |          |     |
|-----------------------|---------|-----------------------------------------------|-----------|---------------|----------|-----|
| Name                  | Country | Study design                                  | Selection | Comparability | Exposure | Tot |
| Balaya2022 [14]       | France  | Retrospective Case-Control Multicentric study | 1         | 1             | 2        | 4   |
| Favre2021 [15]        | France  | Prospective Randomized Multycentric study     | 2         | 2             | 2        | 6   |
| Gortzak-Uzan2010 [16] | Canada  | Retrospective Case-Control Monocentric study  | 2         | 2             | 2        | 6   |
| Lennox2016 [17]       | Canada  | Retrospective Case-Control Monocentric study  | 1         | 2             | 2        | 5   |
